# Supplementary material
Source: publisher figshare collection journal article supplement (https://gsajournals.figshare.com/articles/dataset/_/12319226)
Supplement: Supplementary file 1 [file 1]

**Table S1. *C. elegans* strains used in this study**

| Strain               | Marker                      | Genotype or feature                                      | Cross              | Source |
|----------------------|-----------------------------|----------------------------------------------------------|--------------------|--------|
| N2                   | -                           | wild-type                                                | -                  | CGC    |
| <i>rsu-1(tm6690)</i> | -                           | deletion of 778 bp from N-terminal                       | Outcross 3 times   | NBRP   |
| NK358                | PAT-3::GFP                  | <i>qyls43 [pat-3::gfp + ina-1(genomic) + unc-119(+)]</i> | -                  | CGC    |
| NH2447               | egl-15p::GFP                | <i>ayls2 [egl-15p::gfp + dpy-20(+)] IV</i>               | -                  | CGC    |
| MT2124               | -                           | <i>let-60(n1046)IV</i>                                   | -                  | CGC    |
| YC0074               | PAT-3::GFP                  | <i>rsu-1(tm6690);; pat-3::gfp</i>                        | YC0073 ×<br>NK358  |        |
| YC0214               | <i>Pegl-15::GFP</i>         | <i>rsu-1(tm6690);;egl-15p::gfp</i>                       | YC0073 ×<br>NH2447 |        |
| YC0292               | LifeAct::mKate              | <i>mex-5p::LifeAct::mKate::nmy-2UTR, UNC-119+ (x1)</i>   | -                  |        |
| YC0374               | mCherry::RSU-1              | <i>mCherry::rsu-1</i>                                    | -                  |        |
| YC0395               | mCherry::RSU-1;;PAT-3::GFP  | <i>mCherry::rsu-1;; pat-3::gfp</i>                       | YC0374 ×<br>NK358  |        |
| YC0415               | LifeAct::mKate              | <i>egl-15p::LifeAct::mKate::unc-54UTR</i>                | -                  |        |
| YC0421               | GFP::UNC-97                 | <i>gfp::unc-97</i>                                       | -                  |        |
| YC0438               | mCherry::RSU-1;;GFP::UNC-97 | <i>mCherry::rsu-1;; gfp::unc-97</i>                      | YC0374 ×<br>YC0421 |        |
| YC0459               | ATN-1::GFP                  | <i>egl-15p::atn-1::gfp::unc-54UTR</i>                    | -                  |        |
| YC0506               | RSU-1 LRR1-7::mCherry       | <i>Prsu-1::LRR1-7::unc-54UTR;rsu-1(tm6690)</i>           | -                  |        |
| YC0507               | RSU-1 LRR1-4::mCherry       | <i>Prsu-1::LRR1-4::unc-54UTR;rsu-1(tm6690)</i>           | -                  |        |
| YC0508               | RSU-1 LRR5-7::mCherry       | <i>Prsu-1::LRR5-7::unc-54UTR;rsu-1(tm6690)</i>           | -                  |        |
| YC0554               | RSU-1 LRR1-5::mCherry       | <i>Prsu-1::LRR1-5::unc-54UTR;rsu-1(tm6690)</i>           | -                  |        |
| YC0555               | RSU-1 LRR1-6::mCherry       | <i>Prsu-1::LRR1-6::unc-54UTR;rsu-1(tm6690)</i>           | -                  |        |

**Table S2. Primers used in this study**

| Gene          | Clone   | Forward primer (5'-3')       | Reverse primer (5'-3')              |
|---------------|---------|------------------------------|-------------------------------------|
| <i>rsu-1</i>  | C34C12  | CTGATATCCGGATTTGGTCAGTCTTC   | CAGGTACCGCATTATTTAGGCAGCAC          |
| <i>atn-1</i>  | RW#203L | CGGGGTACCTACTCCGCAACCCATACTG | TCCCCGCGG<br>GTCCTGGTCTGATCGTATAGCC |
| <i>let-60</i> | ZK792   | AAGAGGATCGATCACAAGTTTCA      | AAATCCTTCTCCACTTCGTTTTTC            |

**Table S3. The gene and clone of several actin bundles protein candidates**

| Gene          | Clone     | Forward primer (5'-3')  | Reverse primer (5'-3')  |
|---------------|-----------|-------------------------|-------------------------|
| <i>plst-1</i> | Y104H12BR | AGATATCTACGACGGCAATCAAA | AAAGATGGAAAAACGGGAAAATA |
| <i>cyk-1</i>  | F11H8     | CTTGACCAACGACTCCCAAT    | TGGTCCCATGAGAAAGTTCC    |
| <i>fhod-1</i> | C46H11    | CTTCTCTGCCAACCGCTTAC    | TACATTGGAAACCAGCGACA    |
| <i>viln-1</i> | C10H11    | GTCCCCTTTCAGAAAAGATTCAT | TTACCCACATTTTGTAGCACCTC |

**Table S4. The sequence of mCherry::RSU-1**

| mCherry::RSU-1                                                                                                                                                                                                                                                                                                                                                                                                                                                                                                                                                                                                                                                                                                                                                                                                                                                                                                                                                                                                                                                                                                                                                                                                                                                                                                                                                                                                                                                                                                                                                                                                              |
|-----------------------------------------------------------------------------------------------------------------------------------------------------------------------------------------------------------------------------------------------------------------------------------------------------------------------------------------------------------------------------------------------------------------------------------------------------------------------------------------------------------------------------------------------------------------------------------------------------------------------------------------------------------------------------------------------------------------------------------------------------------------------------------------------------------------------------------------------------------------------------------------------------------------------------------------------------------------------------------------------------------------------------------------------------------------------------------------------------------------------------------------------------------------------------------------------------------------------------------------------------------------------------------------------------------------------------------------------------------------------------------------------------------------------------------------------------------------------------------------------------------------------------------------------------------------------------------------------------------------------------|
| cgccccctctcaacaaatatatgtctctgtgtctttacagggtcatgtactatctcgttggaatccccttgaatgggtattccagctgtgttccctttttccatttttgcctagt<br>tctccgcaattatatttaatagaggattagaaagtgagaaagtgaaaaagatcttgggaattgctatttctcaaattttgtgtcgcgatgcaccatgtcaaagtatgaaaata<br>gtcatatttaacactgattttatcgttatcaactcggaagcaccatttccatccacaaaaaaggatgtaaaaaattaaatttcaggtaaaaATG GTCTCAA<br>AGGGTGAAGAAGATAACATGGCAATTATTAAAGAGTTTATGCGTTTCAAGGTGCATATGGAGGGATCT<br>GTCAATGGGCATGAGTTTGAAATTGAAGGTGAAGGAGAAGGCCGACCATATGAGGGAACACAAACC<br>GCAAACTAAAGGtaagttaaacaatatataactaactaacctgattatttaaatttcagGTA ACTAAAGGCGGACCATTACCATT<br>CGCCTGGGACATCCTCTCTCCACAGTTTCATGTATGGAAGTAAAGCTTATGTTAAACATCCGGCAGATAT<br>ACCAGATTATTTGAAACTTTCATTCCCGGAGGGTTTTAAGTGGAACGCGTAATGAATTTTGAAGACG<br>GAGGAGTTGTTACAGTGACGCAAGACTCAAGGtaagttaaacagttcggtactaactaaccatacatatttaaatttcagCCTCCA<br>AGATGGAGAATTTATTTATAAAGTCAAACCTTCGAGGAACGAATTTCCCCTCGGATGGACCTGTTATGC<br>AGAAGAAGACTATGGGATGGGAAGCTTCAAGTGAAAGAATGTACCCTGAAGACGGTGCTCTTAAGG<br>GAGAGATTAAACAACGTCTTAAATTGAAAGATGGAGGACATTACGATGCTGAGGtaagttaaacaatgattttactaa<br>ctaactaatctgatttaaatttcagGTGAAGACAACCTTACAAAGCCAAAAAACCAGTTTCAGCTGCCAGGAGCGTAC<br>AATGTTAATATTAACTGGATATCACCTCCCACAACGAGGATTACACTATCGTTGAGCAATATGAAAGA<br>GCTGAAGGGCGGCACTCGACAGGTGGCATGGATGAATTGTATAAGCCAAAGGACAAGAAGAAAGAC<br>GAAGTGACAGAAGTTGAACATGTCGATCGGAATATTTTCGTCGTTTTCTCAAATTTACATCTCAgtaagca<br>ttttttgagctctgcgccacattgacgcgcaaatctcaattattccatgggttcgtatgcattagaaattgatctggcggagcagcagctgttgcctgtgctcagctcct<br>ccgcgggaaaatcgtaaatagaatttgcgcgtcaatacgggtcattgggtctgtagatcaaaataaatgtgttgcctcttaggctgaggcttaggttcaggcttgggctt<br>aa |

**Table S5. The sequence of GFP::UNC-97**

| GFP::UNC-97                                                                                                                                                                                                                                                                                                                                                                                                                                                                                                                                                                                                                                                                                                                                                                                                                                                                                                                                                                                                                                                                                                                                                                                                                                                                                                                                                                                                                                                                                                                                                                                                                                                                                                                                                                      |
|----------------------------------------------------------------------------------------------------------------------------------------------------------------------------------------------------------------------------------------------------------------------------------------------------------------------------------------------------------------------------------------------------------------------------------------------------------------------------------------------------------------------------------------------------------------------------------------------------------------------------------------------------------------------------------------------------------------------------------------------------------------------------------------------------------------------------------------------------------------------------------------------------------------------------------------------------------------------------------------------------------------------------------------------------------------------------------------------------------------------------------------------------------------------------------------------------------------------------------------------------------------------------------------------------------------------------------------------------------------------------------------------------------------------------------------------------------------------------------------------------------------------------------------------------------------------------------------------------------------------------------------------------------------------------------------------------------------------------------------------------------------------------------|
| gtcaaccgctgcgcatcctatacctttggcacatttgccctcttccttgaggattttcttcttttctactgtttcacag<br>ccccctcgtataatacctccagtggtttttacgattccttagaatatggaaatttctgtgtttatgcaaaaatttact<br>ttgcatataacaaaatgtagatatgaaattctgactttttgtgctcttttcgattaaccaacatacctaacctata<br>cacactatatgcttttctccggctttcccttggtttgtacataatttgtcttcatattactcgctcgcttttcttttctt<br>ctttcctacccccacctttttccttacaaacccatggctcggttaaaccatcctgtgtgcatagtggccaactttcag<br>tggttcaataatagatgggtgtgtggcggaATGAGTAAAGGAGAAGAACTTTTCACTGGAGTTGTCCCAAT<br>TCTTGTTGAATTAGATGGTGATGTAAATGGGCACAAATTTTCTGTCACTGGAGAGGGTGAAGGTGATG<br>CAACATACGGAAACTTACCCTTAAATTTATTTGCACTACTGGAAACTACCTGTTCCATGGgtaagtttaa<br>catatatatactaactaacctgattatttaaatttcagCCAACACTTGTCACTACTTTCTgTTATGGTGTTCATGCTTcTCgAG<br>ATACCCAGATCATATGAAACgGCATGACTTTTTCAAGAGTGCCATGCCCCAAGGTTATGTACAGGAAA<br>GAACTATATTTTTCAAAGATGACGGGAACTACAAGACACgtaagtttaaacagttcggtactaactaaccatacatatttaaatttc<br>agGTGCTGAAGTCAAGTTTGAAGGTGATACCCCTGTTAATAGAATCGAGTTAAAAGGTATTGATTTTAA<br>AGAAGATGGAAACATTCTTGACACAAATTGGAATACAACATAACTCACACAATGTATACATCATGG<br>CAGACAAACAAAAGAATGGAATCAAAGTTgtaagtttaacatgattttactaactaactaatctgatttaaatttcagAACTTCAAA<br>ATTAGACACAACATTGAAGATGGAAGCGTTCAACTAGCAGACCATTATCAACAAAATACTCCAATTGG<br>CGATGGCCCTGTCCTTTTACCAGACAACCATTACCTGTCCACACAATCTGCCCTTTCGAAAGATCCCA<br>ACGAAAAGAGAGACCACATGGTCCTTCTTGAGTTTGTAAACAGCTGCTGGGATTACACATGGCATGGA<br>TGAACATACAAAATGGATTCCGACCACAATCATATCAACGGGGATCTCGCCCATGGCTTCGAGAACATGGTGT<br>GCGTCCGTTGTAATGATGGTTTTTTCGATGCAAGATCAGATGGTGAACCTTCCGGGCAAGTATGGCATTTCGGAGTG<br>TTTTGTgtaagtttttataagtttagaattaagagaactcaaaaattgcaaaaaaatttttagATGTGCTCAATGCT<br>TTGAGCCATTCCCAGACGGCATCTACTTTGAGTATGAAGGACGAAAGTACTGCGAGCATGACTTCCATGTTCTGTT<br>CTCACCATGTTGTGGAAATGCAGtaagtatctttgagaagacacgcagagccataaatgt |
