# Supplementary material
Source: publisher figshare collection journal article supplement (https://gsajournals.figshare.com/articles/dataset/_/12319226)
Supplement: Supplementary file 2 [file 1]

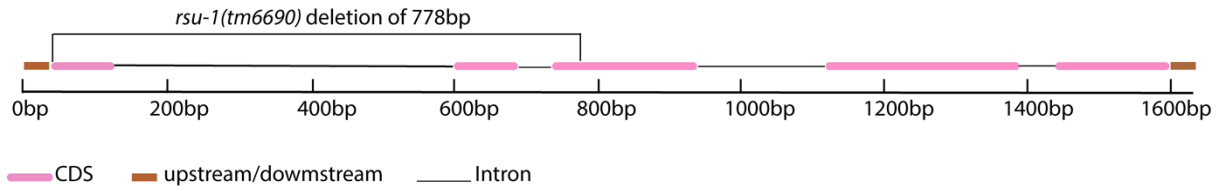

**Figure S1. Structure of the *rsu-1* locus.**

The *rsu-1(tm6690)* mutant harbors a 778-bp deletion at the 5'-end of the locus.

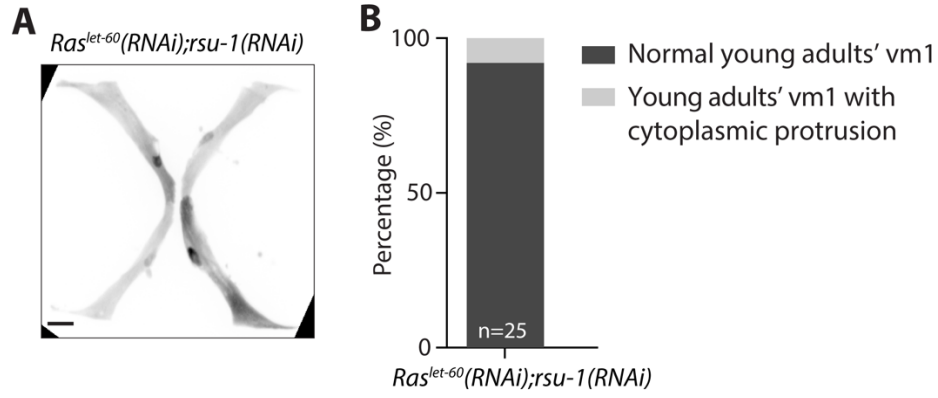

**Figure S2. Depletion of Ras<sup>LET-60</sup> and RSU-1 suppresses cytoplasmic protrusions in *rsu-1(tm6690)*.**

- (A) Representative confocal images of *Pegl-15::GFP;Ras<sup>let-60</sup>(RNAi);rsu-1(RNAi)*. Scale bar, 10  $\mu$ m.
- (B) Percentage of vulval muscle showing cytoplasmic protrusions in *rsu-1(RNAi);Ras<sup>let-60</sup>(RNAi)*.

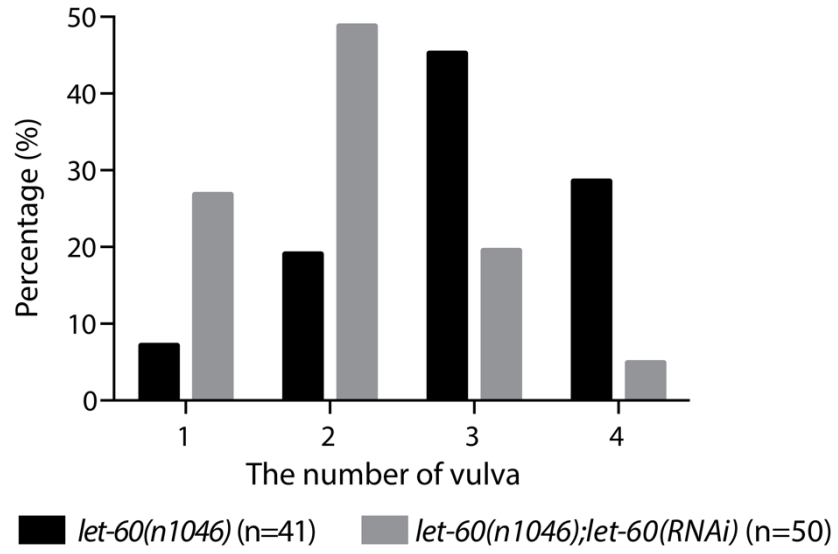

**Figure S3. Depletion of Ras<sup>LET-60</sup> suppresses the multivulva in *let-60(n1046)*.**  
 Ratio of different vulva worm in *let-60(n1046)* and *let-60(n1046);Ras<sup>let-60</sup>(RNAi)*.

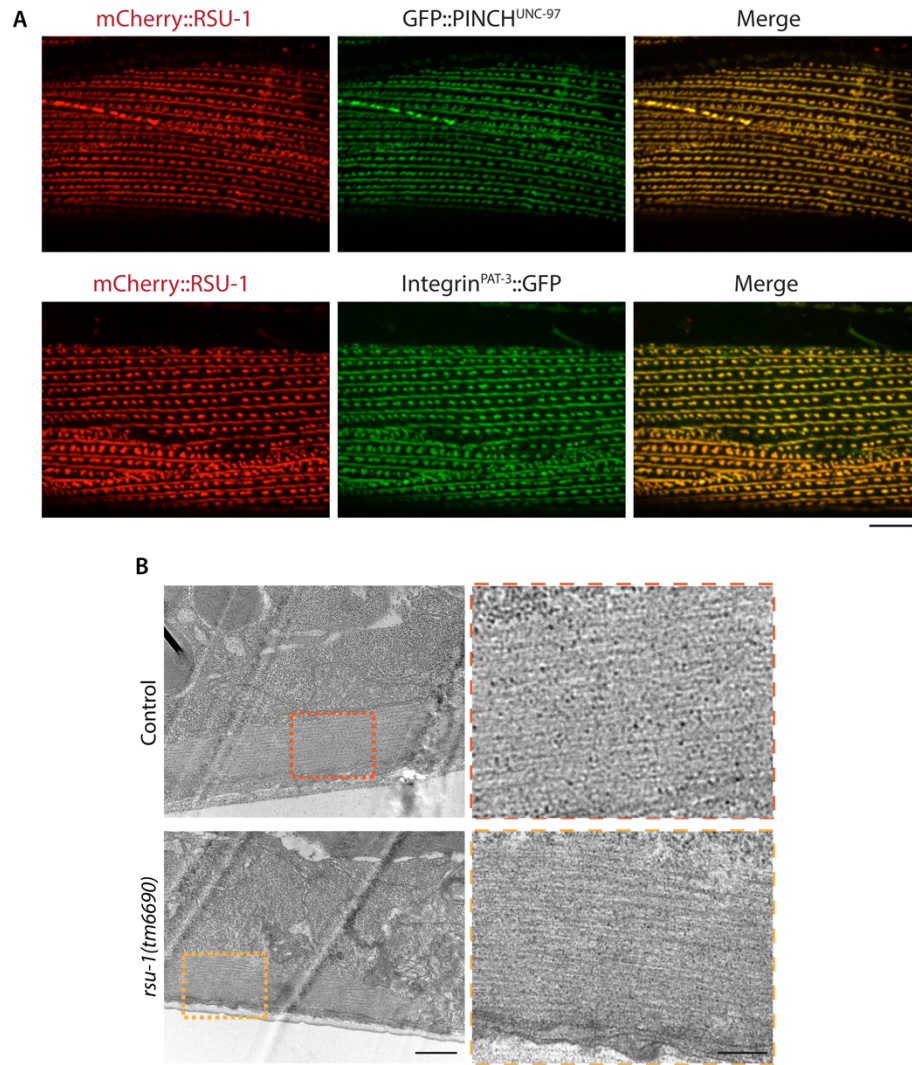

**Figure S4. RSU-1 does not regulate subcellular localization of Integrin<sup>PAT-3</sup> and PINCH<sup>UNC-97</sup>.**

- (A) Representative confocal images of mCherry::RSU-1;GFP::PINCH<sup>UNC-97</sup> and mCherry::RSU-1;Integrin<sup>PAT-3</sup>::GFP in body-wall muscles. Scale bar, 10 μm.
- (B) Representative TEM images of body-wall muscle in control and *rsu-1(tm6690)*. Scale bar, 10 and 5 μm.

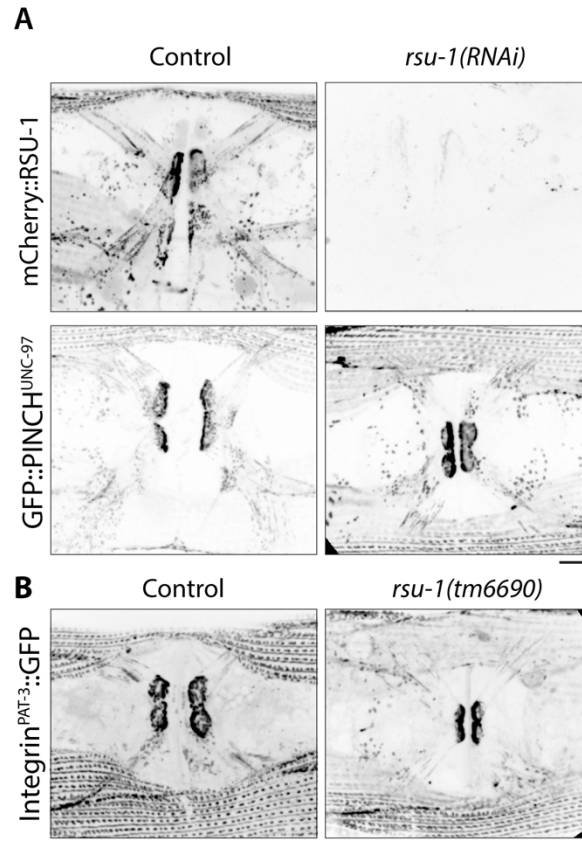

**Figure S5. Depletion of RSU-1 does not change the focal adhesion sites in vulval muscle.**

(A) Representative confocal images of mCherry::RSU-1 and mCherry::RSU-1;*rsu-1(RNAi)*.

Representative confocal images of GFP::PINCH<sup>UNC-97</sup>, GFP::PINCH<sup>UNC-97</sup>;*rsu-1(RNAi)*.

Scale bar, 10  $\mu$ m.

(B) Representative confocal images of Integrin<sup>PAT-3</sup>::GFP, and Integrin<sup>PAT-3</sup>::GFP;*rsu-*

*1(tm6690)*. Scale bar, 10  $\mu$ m.

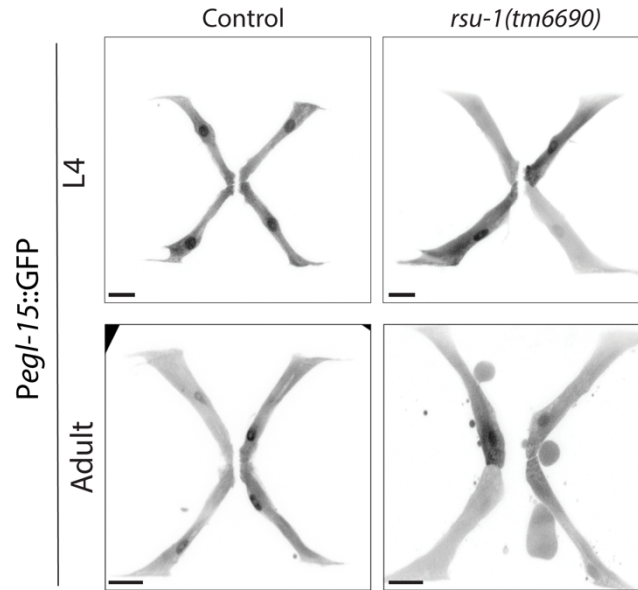

**Figure S6. The morphology of vm1 muscle cells in L4 stage and adult stage.**

Representative confocal images of *Pegl-15::GFP* and *Pegl-15::GFP;rsu-1(tm6690)* in L4 stage and adult stage. Scale bar, 10  $\mu$ m.
